# Supplementary material for: Pollutant emission reductions deliver decreased PM 2.5 -causedmortality across China during 2015–2017
Source: Copernicus journal article supplement (doi:10.5194/acp-2019-1141), 2020-02-17
Supplement: Supplementary file 1 [file acp-2019-1141-supplement.zip]

Archive with 1 entries (1 files):
- Supplementary_figures_ACP.pdf
