# Supplementary material for: Pollutant emission reductions deliver decreased PM 2.5 -causedmortality across China during 2015–2017
Source: Copernicus journal article supplement (doi:10.5194/acp-2019-1141), 2020-02-17
Supplement: Supplementary file 1 [file acp-2019-1141-supplement.zip › Supplementary_figures_ACP.pdf]

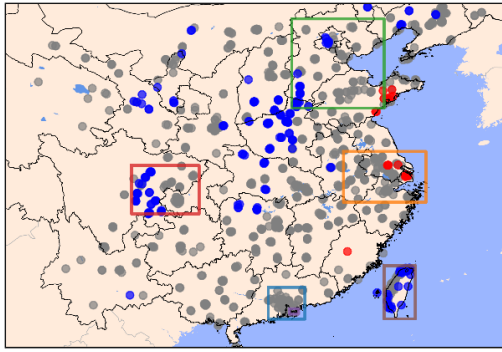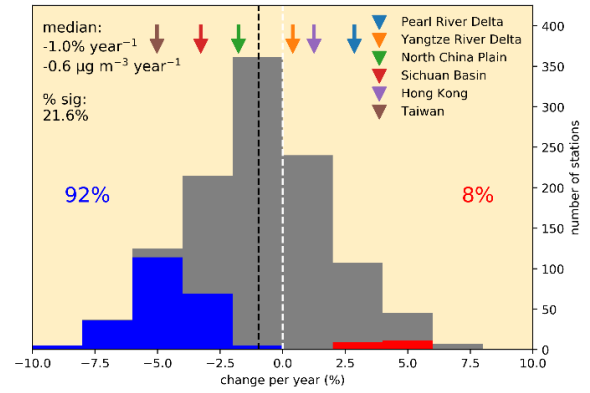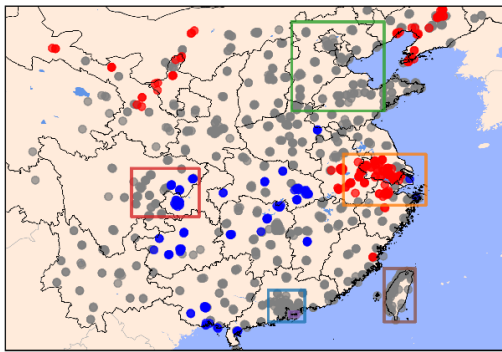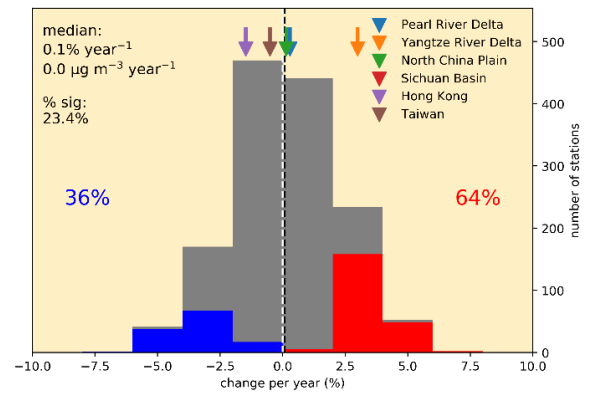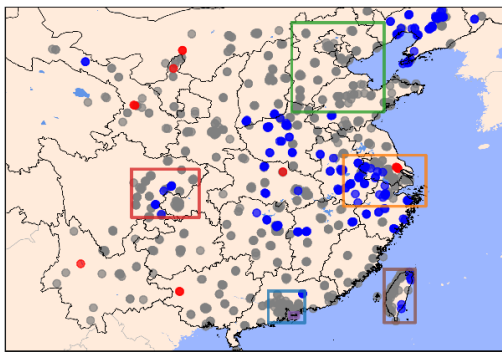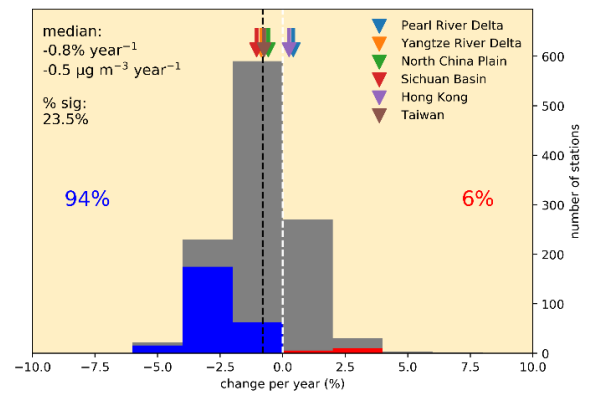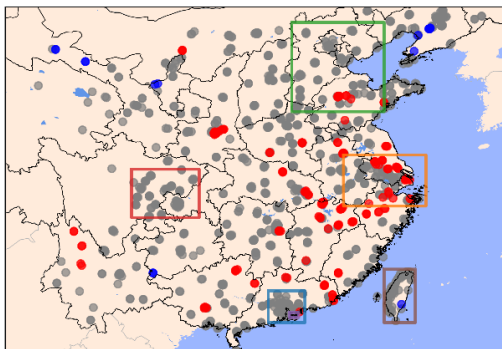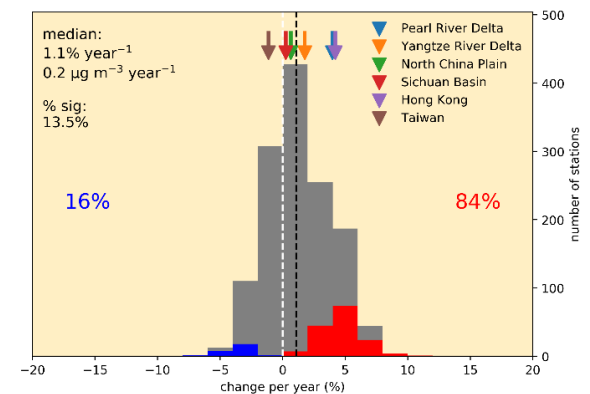

**Figure S1.** Maps and histograms showing the frequency distribution of trends in concentrations of (a,b) PM<sub>2.5</sub>, (c,d) O<sub>3</sub>MDA8, (e,f) NO<sub>2</sub>, (g,h) SO<sub>2</sub> across China and Taiwan during 2015–2017 using the model data from the fixed emissions run, sampled at the locations of stations in the measurement dataset. The median relative and absolute trend as well as the percentage of stations with significant trends is shown on each panel. The percentage of significant trends that are negative (blue) or positive (red) are also shown. The black dotted line shows the median trend across all sites, while the white dotted line shows zero. Arrows show the median trend for the regional domain: Pearl River Delta (PRD), Yangtze River Delta (YRD), North China Plain (NCP), Sichuan Basin (SCB), Hong Kong (HK), Taiwan (TW) and the Fenwei Plain (FWP).

Comparison of PM2.5\_DRY model and measurement trends during 2015-2017

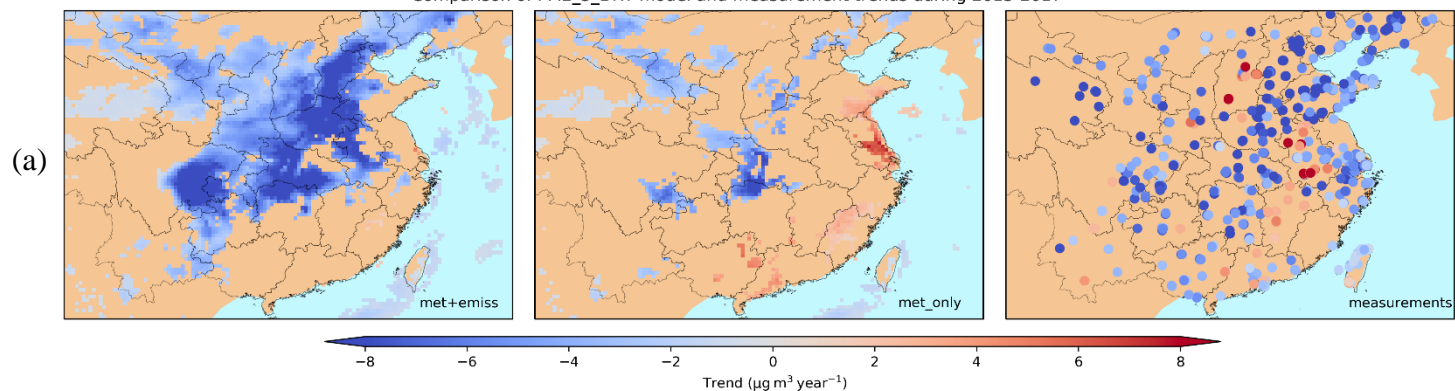

Comparison of o3 model and measurement trends during 2015-2017

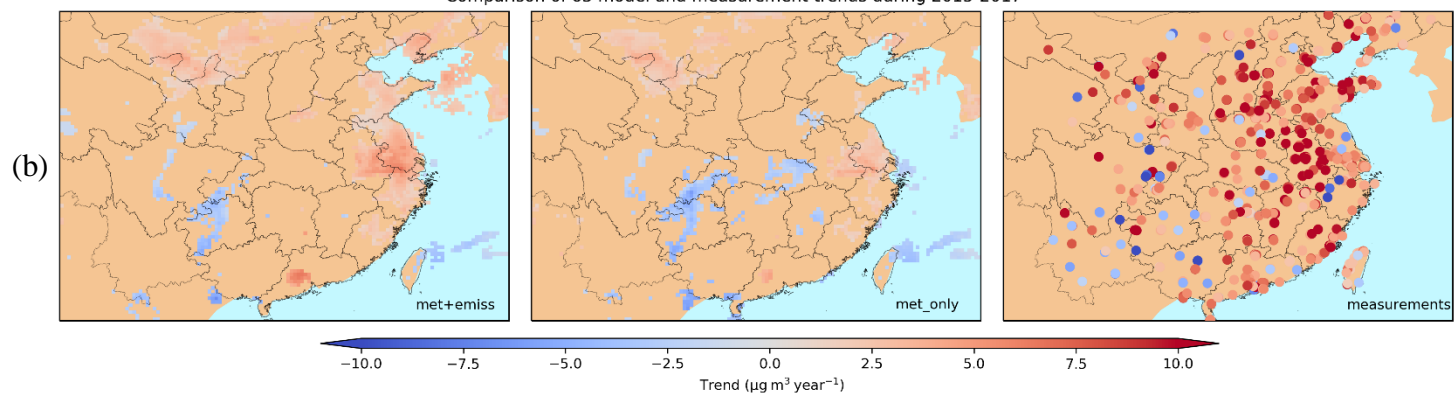

Comparison of no2 model and measurement trends during 2015-2017

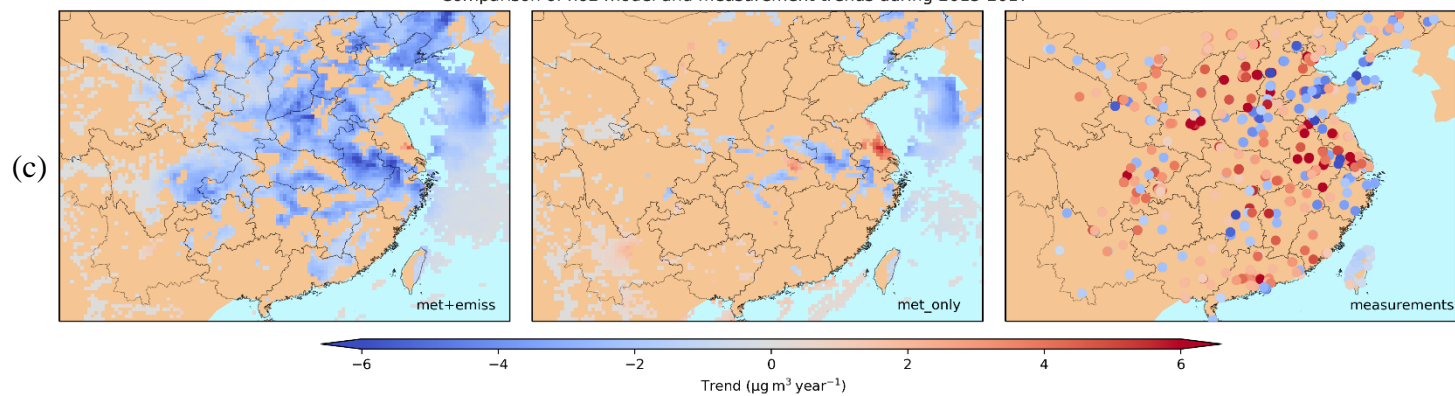

Comparison of so2 model and measurement trends during 2015-2017

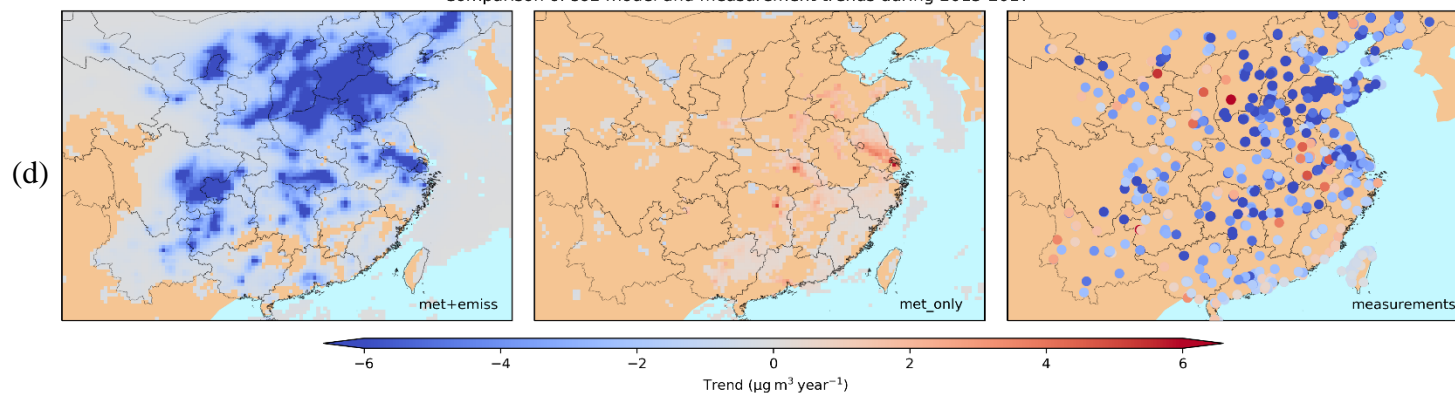

**Figure S2.** Maps comparing the calculated trends in the control model run (left) the fixed emissions model run (centre), and the measurement data (right) for (a) PM<sub>2.5</sub>, (b) O<sub>3</sub>, (c) NO<sub>2</sub>, (d) SO<sub>2</sub> across China and Taiwan during 2015–2017 . The trend was calculated at each grid cell in the model runs, and at each station in the measurements dataset. Only statistically significant trends are shown.

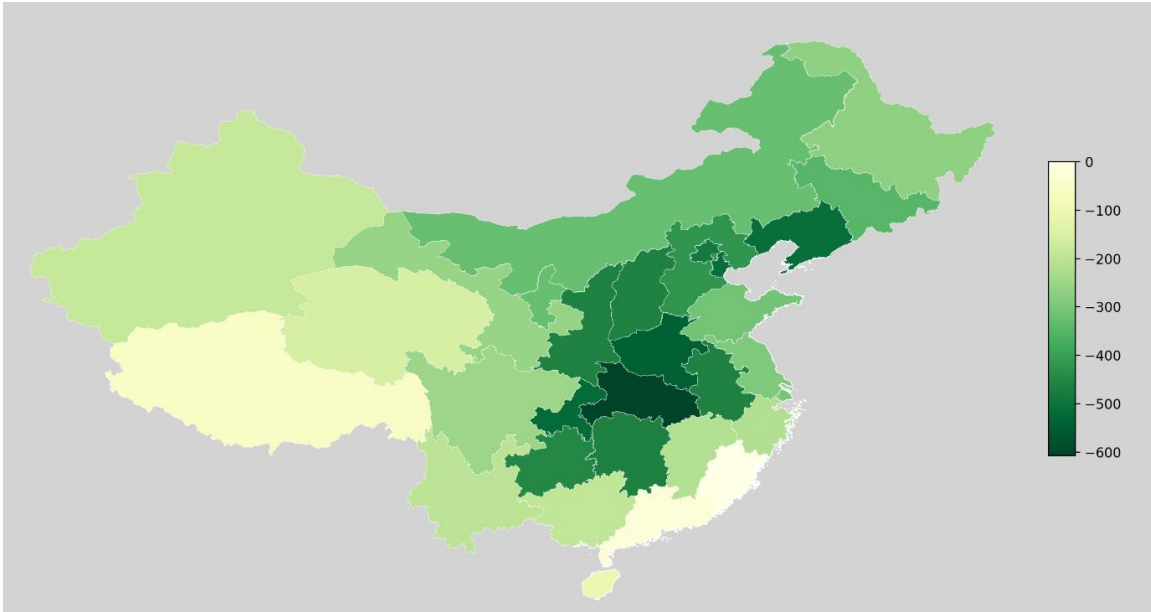

**Figure S3.** Simulated change during 2015-2017 in disability adjusted life years rate (per 100000 population, per year) due to changes in exposure to ambient PM<sub>2.5</sub>. Results are shown at the province scale.
